# Supplementary material for: Study on Mother Wavelet Optimization Framework Based on Changepoint Detection of Hydrological Time Series
Source: Copernicus journal article supplement (doi:10.5194/egusphere-2022-540), 2022-09-28
Supplement: Supplementary file [file egusphere-2022-540-RC1-supplement.pdf]

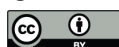

# Study on Mother Wavelet Optimization Framework Based on Changepoint Detection of Hydrological Time Series

Jiqing Li<sup>1</sup>, Jing Huang<sup>1</sup>, Lei Zheng<sup>1</sup>, Wei Zheng<sup>1</sup>

<sup>1</sup>School of Water Resources and Hydropower Engineering, North China Electric Power University, Beijing, 102206, China

5 Correspondence to: Jing Huang (jinghuang23@163.com)

are

HTS is a plural phrase

**Abstract.** Hydrological time series (HTS) is the key basis of water conservancy project planning and construction. However, under the influence of climate change, human activities and other factors, the consistency of HTS has been destroyed and cannot meet the requirements in mathematical statistics. It is urgent to find a better way to divide HTS. Wavelet transform is an effective way to catch the evolution of HTS, but its accuracy is highly dependent on the mother wavelet (MWT). To address these issues, we constructed a potential changepoint set based on two traditional detection methods and wavelet changepoint detection (WTCPD). Then, the degree of change before and after the potential changepoint was calculated with the Kolmogorov-Smirnov test, and a changepoint detection framework (CPDF) was proposed. Finally, according to the difference of detection accuracy between MWT in WTCPD, a mother wavelet optimal framework (MWTOF) was proposed, and continuous wavelet transform was carried out to analyse HTS evolution. We used Pingshan Station and Yichang Station in the Yangtze River as study cases. The result shows: (1) CPDF can quickly locate potential changepoints, determine the change trajectory and complete the division of HTS. (2) MWTOF can select the MTW that conforms to HTS characteristics and ensure the accuracy and uniqueness of the transformation. This study analyses the HTS evolution and provides a better basis for hydrological and hydraulic calculation, which will improve the design flood estimation and the operation scheme preparation.

It seems that Jiqing Li tidied up the text (mentioned at line 380). Please do a couple of things for me and the reader. The abstract should be a description of the work and the findings of the article. As it stands, I think that it is asking the reader to carry too many acronyms in their heads, if you are trying to get the main points across. You introduce a lot of them. That said, please make a collection of the acronyms in a list at the end of the text and before the references, and remind the readers of these in your conclusion. Much as you are proud of your work, it is important to be aware that most potential readers will check the abstract, 50% flick through the figures (which should have meaningful stand-alone captions), then perhaps 30% of them the conclusions, and 15% of the cognoscenti the full article.

## 20 1 Introduction

Indent

Under the multiple influences of human activities, atmospheric circulation and other factors, the original evolution of river runoff is featured with randomness, fuzziness, nonlinearity, non-stationarity and multi-time scale variation, which breaks the consistency in the "three properties" of hydrological time series (formed by the time arrangement of hydrological elements such as rainfall and runoff, HTS) (Chen et al., 2021; Fang and Shao, 2022). Independent and identically distributed (IID) is one of the assumptions!!! an assumption of mathematical statistics in hydrological and hydraulic calculation (Mat Jan et al., 2020). When the series cannot meet the requirements of math stationarity statistics, analysing its internal evolution and division will help to improve the analysis and decision-making in hydrological forecasting and operation scheme preparation (Li et al., 2021). In stochastic hydrology, HTS consists of deterministic components and stochastic components. The analysis of its evolution involves period, trend and changepoint (Sanaa et al., 2022). Period and trend mainly focus on deterministic components,

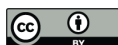

30 while changepoint detection is used to explain the stochastic components caused by various random and uncertain factors (Dang et al., 2021). Changepoint detection determines the starting and ending points of period and trend division, thus is the key to analyse HTS evolution (Şen, 2021). However, affected by feature uncertainty, changepoint detection has become a complex problem because the extent, number and occurrence time of changepoints must be determined at the same time (Zhao et al., 2019). T-test, two-sample Kolmogorov-Smirnov (K-S) test and Shapiro-Wilk test are commonly used

35 quantitative methods for series variation. In particular, the K-S test can calculate the degree of change by indicators such as asymptotic significance (two-tailed,  $p$ ), therefore it is widely used (Jia et al., 2022). please italicise algebraic letters, else they get lost. Commonly used changepoint detection methods include graphical methods (cumulative anomaly method, etc.), parametric methods (sliding T-test, Lee-Heghinian test, etc.) and nonparametric methods (ordered clustering method, Mann-Kendall test, wavelet changepoint detection, etc.). Graphical methods have the advantages of simple calculation and intuitive results, but

40 the detection accuracy is low. Parametric methods assume that the series to be analysed obeys a known distribution, which have certain limitations (Liu et al., 2022). Nonparametric methods have higher detection accuracy, but are easily affected by factors such as parameter settings and series marginal effects (Stasolla and Neyt, 2019). Malki et al. (2022) used machine learning to compare the gap between historical data and forecasts from real-time monitoring data to determine whether the IoT is not defined anywhere in this article consistency of IoT energy consumption data has changed. Shi et al. (2022) constructed a single changepoint test based on the

45 covariance, cumulative sum and likelihood ratio of forecast residuals to detect the potential changepoint in time series. Corradin et al. (2022) constructed a Bayesian nonparametric multivariate changepoint detection method by combining prior distributions with multivariate kernels, and argued that the posterior probability of most changepoints should be lower than the posterior estimate. Xie et al. (2022) calculated the fitted local trend line based on the piecewise linear representation algorithm and the Akaike information criterion to realize changepoint detection and series division, and classified

50 changepoints into three categories with the help of slope and intercept. Changepoint detection is of great significance to series division and is the basis for making full use of HTS to carry out more research. It can be seen that there is no unified standard to determine the changepoint of HTS. Therefore, this is an field worthy of further study.

Indent the leading line of your new paragraph

After the changepoint detection, the period and trend of HTS can be further explored. These methods include cumulative anomaly method, Mann-Kendall (M-K) test, continuous wavelet transform (CWT) and mode decomposition (empirical,

55 extreme point symmetric, etc.) (Oliveira-Júnior et al., 2022; Qin et al., 2021). Among them, CWT is widely used in hydrology because it has a relatively complete theoretical system and it can comprehensively analyse the HTS evolution and reveal the localized characteristics in time domain (time variation) and frequency domain (frequency and amplitude variation) (Zerouali et al., 2022). However, the analysis results of CWT highly depend on the selection of mother wavelet (MWT). Moradi et al. (2022) optimized MWT by comparing the similarity of cross-correlation function, signal-to-noise ratio, and

60 mean standard error between the denoised series and the original. Benhassine et al. (2021) determined the optimal MWT by comparing the minimum mean square error between the original image and the denoised. Strömbergsson et al. (2019) proposed and verified the validity of using the Shannon entropy of the wavelet coefficients as the index for selecting MWT.

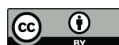

However, changepoint detection has not been explored by scholars to optimize the MWT that conforms to the series characteristics.

65 To solve the above problems, we proposed a changepoint detection framework based on <sup>the</sup> cumulative anomaly method, M-K test, wavelet changepoint detection and K-S test, which can detect the consistency of HTS and complete a reasonable division. Furthermore, based on the detection accuracy <sup>an</sup> MWT optimal framework that conforms to series characteristics was proposed, and the evolution analysis was summarized by CWT. This work pioneeringly proposed an efficient way to optimize the MWT based on variance and changepoint detection. Using the optimal MWT in CWT is helpful in catching the  
70 HTS evolution accurately and fully mining its information, which provides a more <sup>practical</sup> basis for hydrological and hydraulic calculations.

phonetically, pronounced: 'em', 'double you', 'tee' [it's English .....]

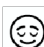

what do you mean? useful? better? improved? 'practical' is defined as "concerned with the actual doing or use of something rather than with theory and ideas". I don't think you mean that

## 2 Methodology

To solve the problems of incomplete changepoint detection and non-unique MWT optimization, we followed the process of potential changepoint set construction, changepoint trajectory determination, MWT optimization and evolution analysis, then  
75 proposed a changepoint detection framework and a MWT optimization framework. The framework is shown in Figure 1.

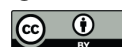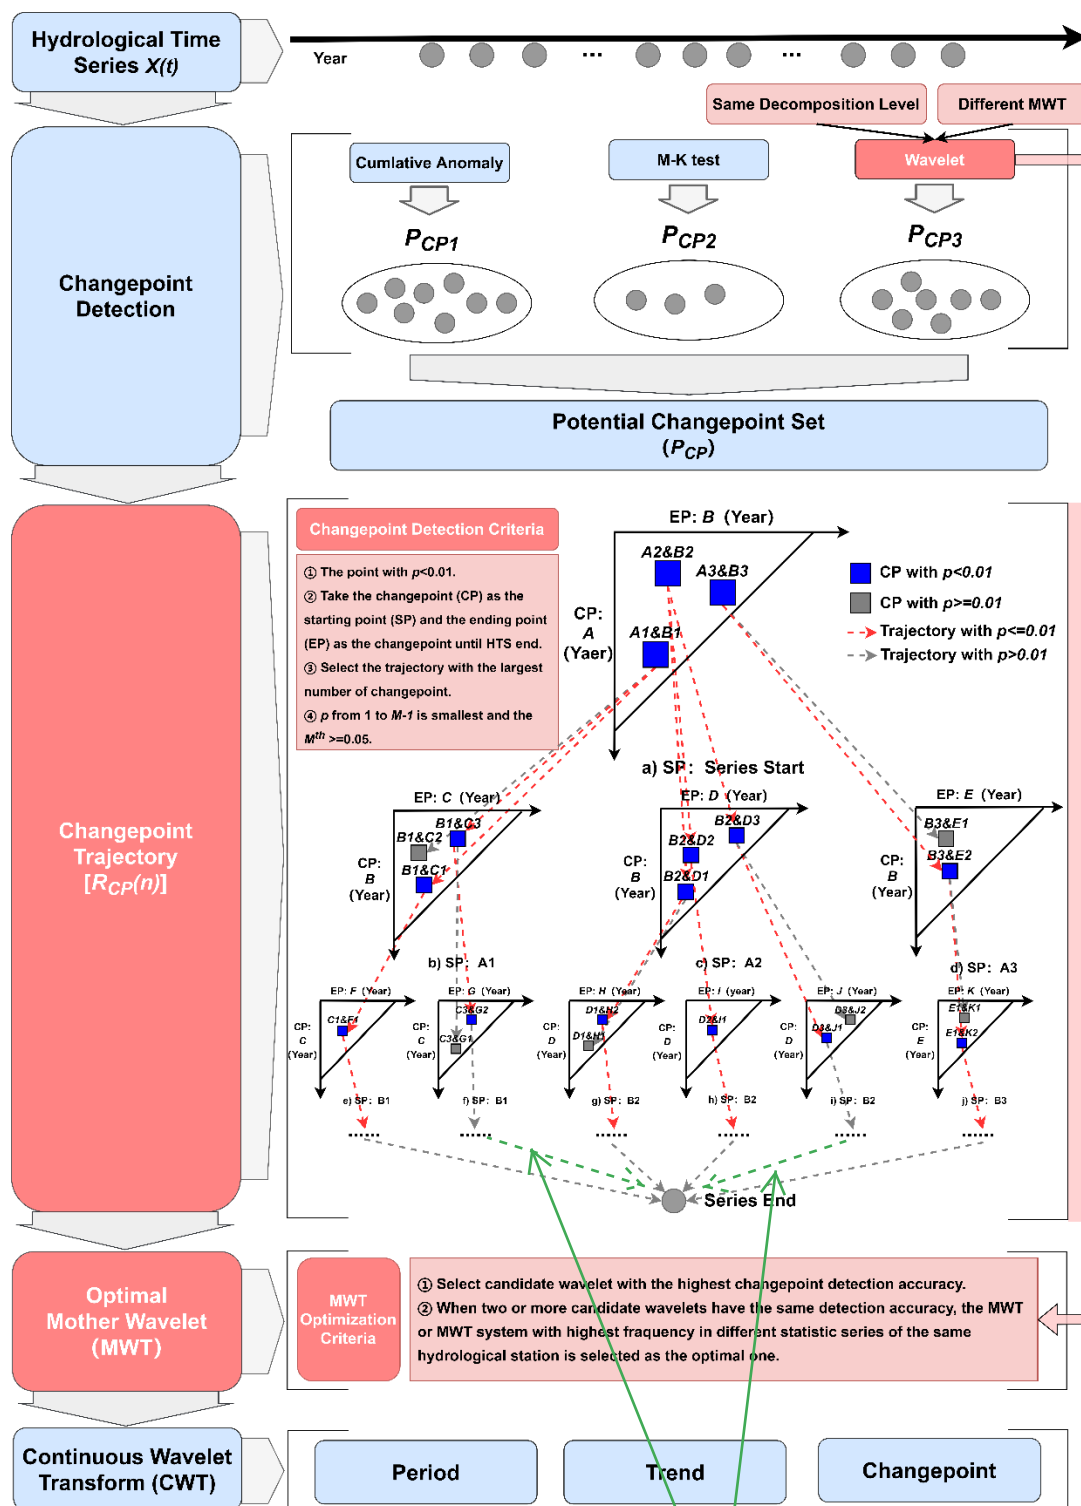

Figure 1: The framework and main content of this study

This is a very complex figure which I am having difficulty unravelling. I cannot follow your text in the pink panels. Your caption is minimal and should be an informative description of what we are supposed to see. I introduced 2 extra green arrows, assuming they are also involved ....?

## 2.1 Wavelet Transform and Changepoint Detection

This is a bit confusing. You have defined MWT above; does this bracket suggest that it is equal to  $\phi(t)$ ?

The Wavelet transform can be divided into Continuous Wavelet Transform (CWT) and Discrete Wavelet Transform (DWT). Its essence is to reveal the similarity between the HTS to be analysed and the MWT. Therefore, the selection of MWT is a key factor affecting the accuracy of wavelet transform. Mother Wavelet ( $\phi(t)$ , MWT) is a wave of finite length and zero mean, with irregularity and asymmetry. The 16 commonly used MWT systems are shown in Table 1 (Moradi, 2022; Nielsen, 2001).

**Table 1: Properties and application range of 16 wavelet systems**

| Order | MWT System         | Symbol <sup>1</sup>    | Quantity of?? | Properties and Application Range <sup>2</sup> |                |                |     |     |
|-------|--------------------|------------------------|---------------|-----------------------------------------------|----------------|----------------|-----|-----|
|       |                    |                        |               | O <sup>3</sup>                                | B <sup>3</sup> | S <sup>3</sup> | CWT | DWT |
| 1     | Haar               | haar                   | 1             | √                                             | √              | √              | √   | √   |
| 2     | Daubechies         | db 2 - 10              | 9             | √                                             | √              | √*             | √   | √   |
| 3     | Biorthogonal       | bior 1.1 ~ 6.8         | 15            | —                                             | √              | —              | √   | √   |
| 4     | Coiflets           | coif 1 - 5             | 5             | √                                             | √              | √*             | √   | √   |
| 5     | Symlets            | sym 2 - 8              | 7             | √                                             | √              | √*             | √   | √   |
| 6     | Morlet             | morl                   | 1             | —                                             | —              | √              | √   | —   |
| 7     | Mexican Hat        | mexh                   | 1             | —                                             | —              | √              | √   | —   |
| 8     | Meyer              | meyr                   | 1             | √                                             | √              | √              | √   | √*  |
| 9     | Gaussian           | gaus 1 - 8             | 8             | —                                             | —              | √              | √   | —   |
| 10    | Dmeyer             | dmey                   | 1             | —                                             | —              | √              | —   | √   |
| 11    | ReverseBior        | rbio 1.1 ~ 6.8         | 15            | —                                             | √              | √              | √   | √   |
| 12    | Complex Gaussian   | cgau 1 - 8             | 8             | —                                             | —              | √              | —   | —   |
| 13    | Complex Morlet     | cmor 1-1.5 ~ 1-0.1     | 6             | —                                             | —              | √              | —   | —   |
| 14    | Frequency B-Spline | fbsp 1-1-1.5 ~ 2-1-0.1 | 6             | —                                             | —              | √              | —   | —   |
| 15    | Fejer-Korovkin     | fk 4 ~ 22              | 6             | √                                             | √              | √*             | √   | √   |
| 16    | Shannon            | shan 1-1.5 ~ 2-3       | 5             | —                                             | —              | √              | —   | —   |

This table is fairly complex and I think you should expand the caption. After all we can count to 16!

Note 1: “-” means the number is consistent, “~” means the number is inconsistent.

Note 2: “√” means has this property. “√\*” means approximately having this property. “—” means does not have this property.

Note 3: Orthogonality (O), Biorthogonality (B), Symmetry (S).

### 2.1.1 Continuous Wavelet Transform (CWT)

85 CWT can be used to determine whether there is periodicity in HTS, and identify the main time scales and their local trends.

Let  $L^2(R)$  denote the measurable square-integrable functions on the real axis. If HTS  $X(t)$  ( $t = 1, 2, \dots, T$ ) is a CWT in  $L^2(R)$ , which can be expressed as:

$$W_X(a, b) = \int_{-\infty}^{+\infty} X(t) \varphi_{a,b}^*(t) dt$$

$$\varphi_{a,b}(t) = \frac{1}{\sqrt{a}} \varphi\left(\frac{t-b}{a}\right) \quad a, b \in R, a \neq 0$$

379 Problem 7.1 (The primal problem). Find the hypermatrix  $\mathbf{h} = [h_{\mathbf{i}}] \in \mathbb{R}^\ell$   
 380 where  $\mathbf{i} = (i_1, \dots, i_m)$  and  $\ell = n^m$  to maximize the entropy

$$J(\mathbf{h}) = (-1) \left[ \frac{1}{n} \sum_{\mathbf{i} \in \{1, \dots, n\}^m} h_{\mathbf{i}} \log_e h_{\mathbf{i}} + (m-1) \log_e n \right] \quad (7.9) \quad (3)$$

381 subject to the multi-stochastic constraints

Indent your equations - they'll all fit the inward jump - see the example above I clipped from a review

90 where,  $W_X(a, b)$  is the coefficient of CWT,  $\varphi_{a,b}^*(t)$  is the complex conjugate function of  $\varphi_{a,b}(t)$ ,  $t$  is the time,  $a$  is the time scale factor, which reflects the period length of MWT, and  $b$  is the time position factor, which reflects the translation of MWT in time.

The multi-time scale variation in wavelet transform refers to the multi-level structure and localized features of  $X(t)$  in the time domain, which is usually analysed with the help of the real part or modulus-square contour map of CWT coefficients.

95 HTS evolution of a certain year on different time scales can be observed by vertically intercepting the contour map. At a certain period, the HTS evolution over time can be observed by horizontally intercepting the contour map. In addition, the positive wavelet coefficient corresponds to the wet season. The negative wavelet coefficient corresponds to the dry season. The wavelet coefficient is zero, which corresponds to the transition point of wet and dry. The larger the absolute value of the wavelet coefficient, the more obvious its change.

### 100 2.1.2 Discrete Wavelet Transform (DWT)

Since the measured HTS is usually discrete, by discretizing Eq.1, we can get:

$$W_X(j, b) = \int_{-\infty}^{+\infty} X(t) \varphi_{j,b}^*(t) dt \quad (3)$$

$$\varphi_{j,b}(t) = a_0^{-\frac{j}{2}} \varphi(a_0^{-j} t - kb_0) \quad (4)$$

Where,  $W_X(j, b)$  is the coefficient of DWT.  $a_0$  and  $b_0$  are both constants.  $j$  ( $j = 1, 2, \dots, J$ ) is the decomposition level.

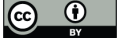

Both  $W_x(a, b)$  and  $W_x(j, b)$  are the values output by  $X(t)$  through the unit impulse response filter, which can reflect the evolution of  $X(t)$  in the time domain and frequency domain at the same time. In practical applications, it is often decomposed with the help of dyadic DWT, i.e.  $a_0 = 2$  and  $b_0 = 1$ , where Eq.4 can be expressed as:

$$\varphi_{j,b}(t) = 2^{-\frac{j}{2}} \varphi(2^{-j}t - k) \quad (5)$$

According to the dyadic DWT, the theoretical maximum value  $J$  of decomposition level  $j$  is:

$$J = \left\lceil \log_2(T_{X(t)}) \right\rceil \quad (6)$$

where,  $\lceil \cdot \rceil$  represents rounding operation and  $T_{X(t)}$  represents the length of the  $X(t)$ .

### 2.1.3 Wavelet Changepoint Detection

Variance is one of the important parameters to detect whether HTS has fundamentally changed. Wavelet changepoint detection is based on the Maximal Overlap Discrete Wavelet Transform (MODWT). By calculating the variance of wavelet coefficients to be analysed one by one (Strömbergsson et al., 2019), the number and location of changepoint at Confidence Level 95% can be determined through the MATLAB software toolbox:

(1) MODWT multi-resolution analysis

Decompose  $X(t)$  into T-dimensional column vectors  $W_1, W_2, \dots, W_J$  and  $V_J$ . Where  $W_J$  is calculated from the MODWT wavelet coefficient of  $X(t)$  within  $\tau_j \Delta t$ .  $V_J$  consists of  $\tau_{j+1} \Delta t$  and higher dimensional MODWT scaling coefficients.  $X(t)$  can be expressed as:

$$X = \sum_{j=1}^J D_j + S_j \quad (7)$$

Where,  $D_j = W_{j^k}^F h_j^*$  ( $k = 0, 1, \dots, T-1$ ) is the  $j^{th}$  maximal-overlap detail.  $S_j = V_{j^k}^F g_j^*$  is the  $j^{th}$  maximal-overlap smooth.  $h_j$  and  $g_j$  are the high-frequency filter and the low-frequency filter, respectively.  $F$  is a  $T \times T$  dimensional matrix that cyclically shifts  $h_j$  by one unit.

(2) MODWT variance decomposition

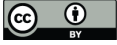

After a series of decompositions are performed on the variance of  $X(t)$  part by part, on the premise that the wavelet coefficient is stable, it can be expressed as:

$$\|X\|^2 = \sum_{j=1}^J \|W_j\|^2 + \|V_j\|^2 \quad (8)$$

etc.

Based on the above decomposition, the evolution of wavelet coefficient variance of  $X(t)$  with time in different time scales can be obtained, and the point where the variance changes can be recorded as the changepoint. It is worth noting that the MWT used for changepoint detection needs to be biorthogonal (see Table 1).

## 2.2 Traditional Changepoint Detection Method

Changepoint detection has always been a significant issue in hydrology. However, except for the deterministic runoff changes caused by human activities such as large-scale river regulation, reservoir construction or operation (seasonal and above regulation capacity), there exist many uncertain factors, such as whether there is a change point in HTS, how many changepoints exist, and the specific occurrence time of each changepoint. Therefore, it is necessary to integrate multiple detection methods. The main methods used in this study are as follows.

### 2.2.1 Cumulative Anomaly Method

Cumulative anomaly is a graphic method. The cumulative anomaly value of  $X(t)$  at a certain time can be expressed as:

$$JP[X(t)] = \sum_{t=1}^N [X(t) - \bar{X}] \quad (9)$$

Where,  $JP[\cdot]$  is the cumulative anomaly value of  $X(t)$ .  $T$  and  $\bar{X}$  are the length and mean of  $X(t)$ , respectively.

The cumulative anomaly curve can be obtained by drawing the cumulative anomaly value in chronological order. According to the curve fluctuation, the change trend and potential changepoint of HTS can be identified. If the cumulative anomaly value is greater than 0, it indicates that the HTS is in an uptrend, otherwise, the HTS is in a downtrend. The point that changes the trend can be regarded as the potential changepoint.

### 2.2.2 Mann-Kendall (M-K) Test

The M-K test analyses the number, location, trend and significance of changepoints in HTS by setting a Confidence Level  $\alpha$  and calculating statistics ( $U_{F_k}$  and  $U_{B_k}$ ). Statistics  $U_{F_k}$  of  $X(t)$  are calculated as follows:





$$U_{F_k}[X(t)] = \frac{S_k^{X(t)} - E[S_k^{X(t)}]}{\sqrt{\text{Var}[S_k^{X(t)}]}} \quad (10)$$

150 where,  $U_{F_k}[X(t)]$  is the statistical series of  $X(t)$  calculated in order.  $S_k^{X(t)}$  is the rank sum of Time  $k$  in  $X(t)$ , which is the cumulative value of the numbers at time  $k$ , greater than time  $i$ : ( $1 \leq k \leq i$ ).  $E[S_k^{X(t)}]$  and  $\text{Var}[S_k^{X(t)}]$  are the mean and variance of  $S_k^{X(t)}$ , respectively.

When  $U_{F_k}[X(t)] > 0$ ,  $X(t)$  shows an upward trend, it shows a downward trend. The statistic  $U_{B_k}[X(t)]$  is obtained by repeating Eq.10 in the reverse order. Draw  $U_{F_k}[X(t)]$  and  $U_{B_k}[X(t)]$  in the same figure. If the two  
 155 statistics intersect within the Confidence Interval  $U_{0.05} = \pm 1.96$  (Confidence Level 95%), the time corresponding to the intersection is the changepoint of  $X(t)$ .

### 2.2.2 Kolmogorov-Smirnov (K-S) Test

The K-S test can determine whether the distributions of the two series are the same according to the maximum vertical distance between the two empirical distributions. The empirical distribution of  $X(t)$  is:

$$160 \quad F_n[X(t)] = \frac{1}{T} \sum_{t=1}^T I_{[-\infty, T]}^n[X(t)] \quad (11)$$

where,  $I_{[-\infty, T]}^n[X(t)]$  is the indicator function of  $X(t)$ .

The Original hypothesis is  $H_0: F_1[X(t)] = F_2[X(t)]$ , that is, the empirical distribution of the two series is consistent.

while the alternative hypothesis is  $H_1: F_1[X(t)] \neq F_2[X(t)]$ , that is, the empirical distribution is inconsistent. To quantify the difference between the empirical distributions, a maximum difference  $D$  is proposed, calculated as:

$$165 \quad D = \sup_{-\infty < X(t) < \infty} |F_1[X(t)] - F_2[X(t)]| \quad (12)$$

$D_{T, \alpha}$  is used to represent the rejection domain when the series capacity is  $T$  at Significant Level  $\alpha$ . When  $D \geq D_{T, \alpha}$ , reject  $H_0$ , otherwise, accept  $H_0$ . To further quantify the significance of the difference,  $p$  is introduced to concretize  $\alpha$ .

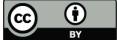

The value of  $\alpha$  is usually 95% or 99%, and the corresponding  $p$  is 0.05 and 0.01. If  $p \leq 0.01$ , it indicates that the determination result is strong and  $H_0$  should be rejected, that is, the two series obey different distributions and are not consistent. If  $0.01 \leq p \leq 0.05$ , the determination result is weak. In this case,  $p$  is considered to be marginal, and  $H_0$  is usually rejected. If  $p > 0.05$ ,  $H_0$  is acceptable.

### 2.3 Changepoint Detection Framework and Criteria

Based on the changepoint detection results of various methods, the potential changepoint set  $P_{CP}(n)$  ( $n = 1, 2, \dots, N$ ) of HTS is constructed with deduplication (i.e. removes the repetitive information before storing it) and sorting. To determine the changepoint, it is necessary to further calculate the degree of change ( $p$ ) before and after potential changepoints with the help of K-S test. At Confidence Level 99%, the detection steps (see Figure 1) and criteria are described as follows:

- (1) Set the starting point of  $X(t)$  to  $P_{CP}(n)$  and the ending point to  $P_{CP}(N+1)$ . Arrange the potential changepoint set in chronological order and record it as  $P_{CP}(n)$  ( $n = 0, 1, 2, \dots, N+1$ ).
- (2) Take  $P_{CP}(0)$  as the starting point and  $P_{CP}(1)$  as the changepoint, the  $p$  of  $P_{CP}(0) - P_{CP}(1) - P_{CP}(2), -P_{CP}(3), \dots, -P_{CP}(N+1)$  is gradually calculated by K-S test, and complete the calculation of  $p$  from  $P_{CP}(0)$  to  $P_{CP}(N-1)$  in chronological order.
- (3) Changepoint Detection Criteria (Detection Criteria): ① Take  $P_{CP}(0)$  as the starting point, select the point with  $p < 0.01$  as the alternative point of the first changepoint. ② Take the alternative point as the starting point and the ending point in Criterion ① as the changepoint, then locate the point with  $p < 0.01$  until  $P_{CP}(N+1)$ , and form multiple changepoint trajectories from  $P_{CP}(0)$  to  $P_{CP}(N+1)$ . ③ Select the trajectory with the largest number of changepoints as the candidate ( $R'_{CP}(n)$ ). ④ Set the changepoint number in  $R'_{CP}(n)$  to  $m$  ( $m = 1, 2, \dots, M$ ), select the trajectory ( $R_{CP}(n)$ ) from  $R'_{CP}(n)$  according to the principle that  $p$  from 1 to  $M-1$  is the smallest and the  $M^{th}$  is greater than 0.05.

Indent subsets (1), (2) & (3). Then in (3), indent a bit more the 4 sub-subsets & (!) and end off with some text after line 188. As it stands, it's a maze!

### 2.4 MWT Optimization Criteria

By comparing  $R_{CP}(n)$  and the results of wavelet changepoint detection, an MWT that conforms to HTS characteristics can be selected. The specific optimization criteria are as follows:

- (1) Select candidate wavelet with the highest changepoint detection accuracy.
- (2) When two or more candidate wavelets have the same detection accuracy, the MWT or the MWT system with the highest frequency in different statistic series (length, flow, etc.) of the same hydrological station is selected as the optimal one.

After optimization, we can perform CWT according to the MWT conforming to HTS characteristics and analyse its evolution. For DWT, HTS can be more accurately decomposed and reconstructed, providing a good basis for hydrological forecasting and reservoir operation scheme formulation.

### 3 Data and Study Area

The Yangtze River originates from the southwest of the Tanggula Mountains on the Qinghai-Tibet Plateau. Its main stream flows through central China from west to east, with a total length of about 6,300 km, and the total catchment area is 1.8 million km<sup>2</sup>, accounting for about 18.8% of the total area of China. The main stream from Yibin to Yichang is called the upstream, with a length of about 4,504 km and an area of about 1 million km<sup>2</sup>. With the superposition and collection of upstream floods to the Yichang Hydrological Station (Yichang Station), it tends to form a process of high peaks and large volumes (Shuhui et al., 2021). The Pingshan Hydrological Station (Pingshan Station) on the Jinsha River controls about half of catchment area and one-third of the flood season average flow of Yichang Station, and is the basic source of upstream flooding. Therefore, exploring the runoff evolution at Pingshan Station and Yichang Station will help to scientifically arrange the watershed storage space to alleviate the frequent floods in flood seasons and water shortages in dry seasons in the middle and lower Yangtze River. The overview of the upper Yangtze River is shown in Figure 2, and the hydrological parameters of the two stations are shown in Table 2.

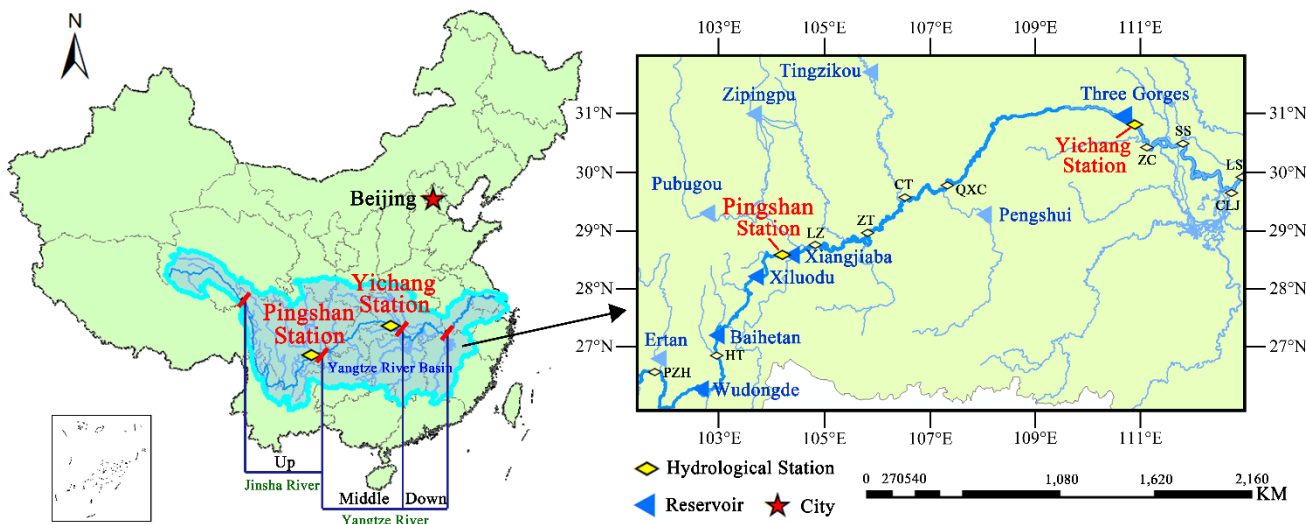

Figure 2: Location of the study area

Table 2: Main hydrological parameters of Pingshan Station and Yichang Station

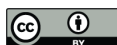

What does this mean?  
 I cannot unpack it.

| River                         |                                          | Jinsha   | Yangtze   |
|-------------------------------|------------------------------------------|----------|-----------|
| Hydrological Station          |                                          | Pingshan | Yichang   |
| Catchment Area                | Area (km <sup>2</sup> )                  | 485,099  | 1,005,501 |
|                               | Proportion (%)                           | 48.2     | 100       |
| Annual Average                | Volume (10 <sup>8</sup> m <sup>3</sup> ) | 1,147    | 3,410     |
| Water Volume                  | Proportion (%)                           | 33.6     | 100       |
| Annual Distribution of Runoff | Flood Season (month)                     | 6-11     | 5-10      |
|                               | Flow (m <sup>3</sup> /s)                 | 44,850   | 127,700   |
|                               | Proportion (%)                           | 81.34    | 78.67     |

The flood season of Pingshan Station is from June to November, and the flood season of Yichang Station is from May to October. The three months with the largest flow at the two stations are both from July to September (accounting for 49.96% and 54.18% of the year, respectively). In 2012, Pingshan Station was moved down 24 km to Xiangjiaba Hydrological Station. In addition, the runoff of Pingshan Station is likely to influence of the upstream Ertan Reservoir (seasonal regulation, water storage in May 1998), and Yichang Station should affect the Three Gorges Reservoir (annual regulation, water storage in June 2003). Combining the above factors, the measured runoff data of Pingshan Station (1950-2011) and Yichang Station (1950-2016) were used to test the applicability of the changepoint detection framework and the MWT optimization framework proposed in this study, and the runoff evolution of the two stations was analysed by CWT.

## 4 Results and Discussion

The statistical series of the two stations used in the study includes: Pingshan annual mean runoff series (Pingshan Annual Series, PAS), Pingshan 6-11 mean runoff series (Pingshan Flood Season Series, PFSS), Yichang annual mean runoff series (Yichang Annual Series, YAS) and Yichang 5-10 mean runoff series (Yichang Flood Season Series, YFSS), collectively referred to as 4-Series.

Please unpack and reword this paragraph because it does not mean anything to me, as it is self contradictory.

### 4.1 Potential Changepoints of Pingshan Station and Yichang Stations

The cumulative anomaly method, M-K test and wavelet changepoint detection were used to identify the potential changepoints in the 4-Series. At the same time, by comparing the annual series and the flood season series at the one station, we further analysed the sensitivity of the three methods to the variation of flow amplitude and the influence of flood season on the annual series.

#### 4.1.1 Results of Cumulative Anomaly Method and M-K Test

The points causing the trend change can be regarded as potential changepoints, and the detection results of the cumulative anomaly method are shown in Figure 3. At Confidence Level 95% (the upper and lower critical lines are  $\pm 1.96$ ), the

intersection of  $U_{F_k}$  and  $U_{B_k}$  is a potential changepoint, and the M-K test results are shown in Figure 4. Potential  
 235 changepoints in the two figures were marked in red.

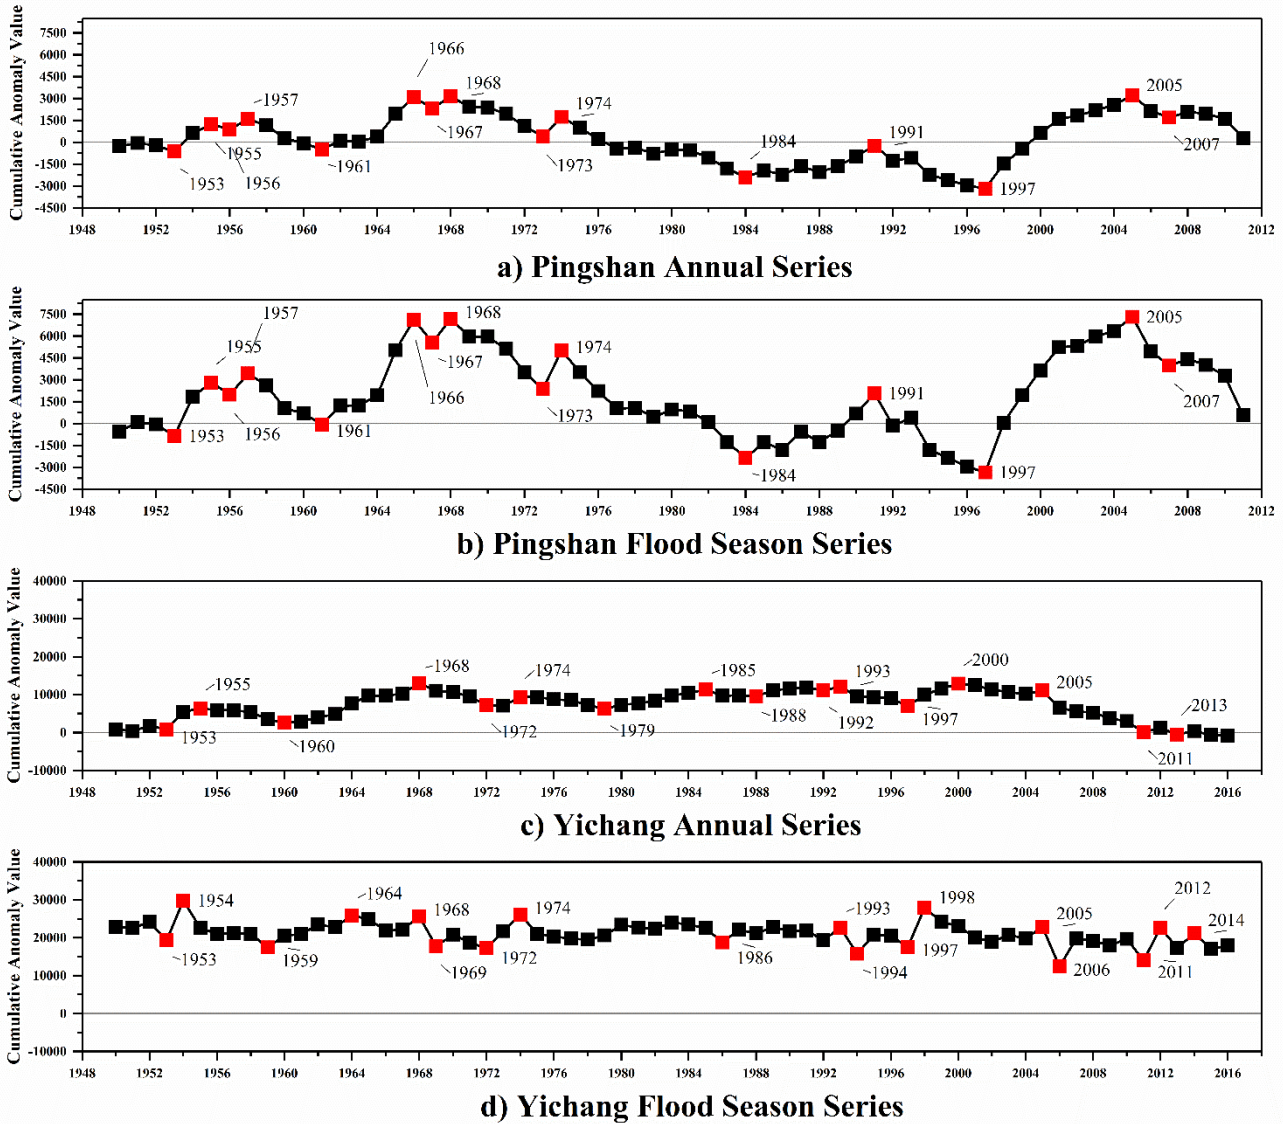

**Figure 3: Results of cumulative anomaly method for Pingshan Station and Yichang Station**

The number of potential changepoints of 4-Series detected by the cumulative anomaly method is 15, 15, 16 and 18 (Figure 3). However, the number detected by the M-K test is 2, 2, 0 and 0 (Figure 4). In addition, there are differences in the potential  
 240 changepoint detection results between the annual series and the flood season series, indicating that the cumulative anomaly method has certain response ability to flow changes. However, the consistent rate of potential changepoints in Pingshan Station is 100%, while Yichang Station is 37.5% and 33.33%, respectively. This means that the response ability can only be reflected when the flow variation reaches a certain extent.



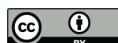

The changepoint detection results of M-K test at Pingshan Station (Figure 4a-b) are concentrated around 1956 and 2005. During the same time scale, the intersection of the flood season series is slightly later than the annual series, but the amplitude of  $U_{F_k}$  and  $U_{B_k}$  is lower, which indirectly reflects the flood season in Pingshan Station is relatively gentle, but the difference between the wet and dry seasons of the year is obvious. The YFSS is the opposite. In addition, the detection results of M-K test for 4-Series are basically consistent, insensitive to flow variation. The detected number of potential changepoints is small. It can be included that the cumulative anomaly method is more suitable for constructing the potential changepoint set of HTS. A more accurate locating of the changepoint needs other methods.

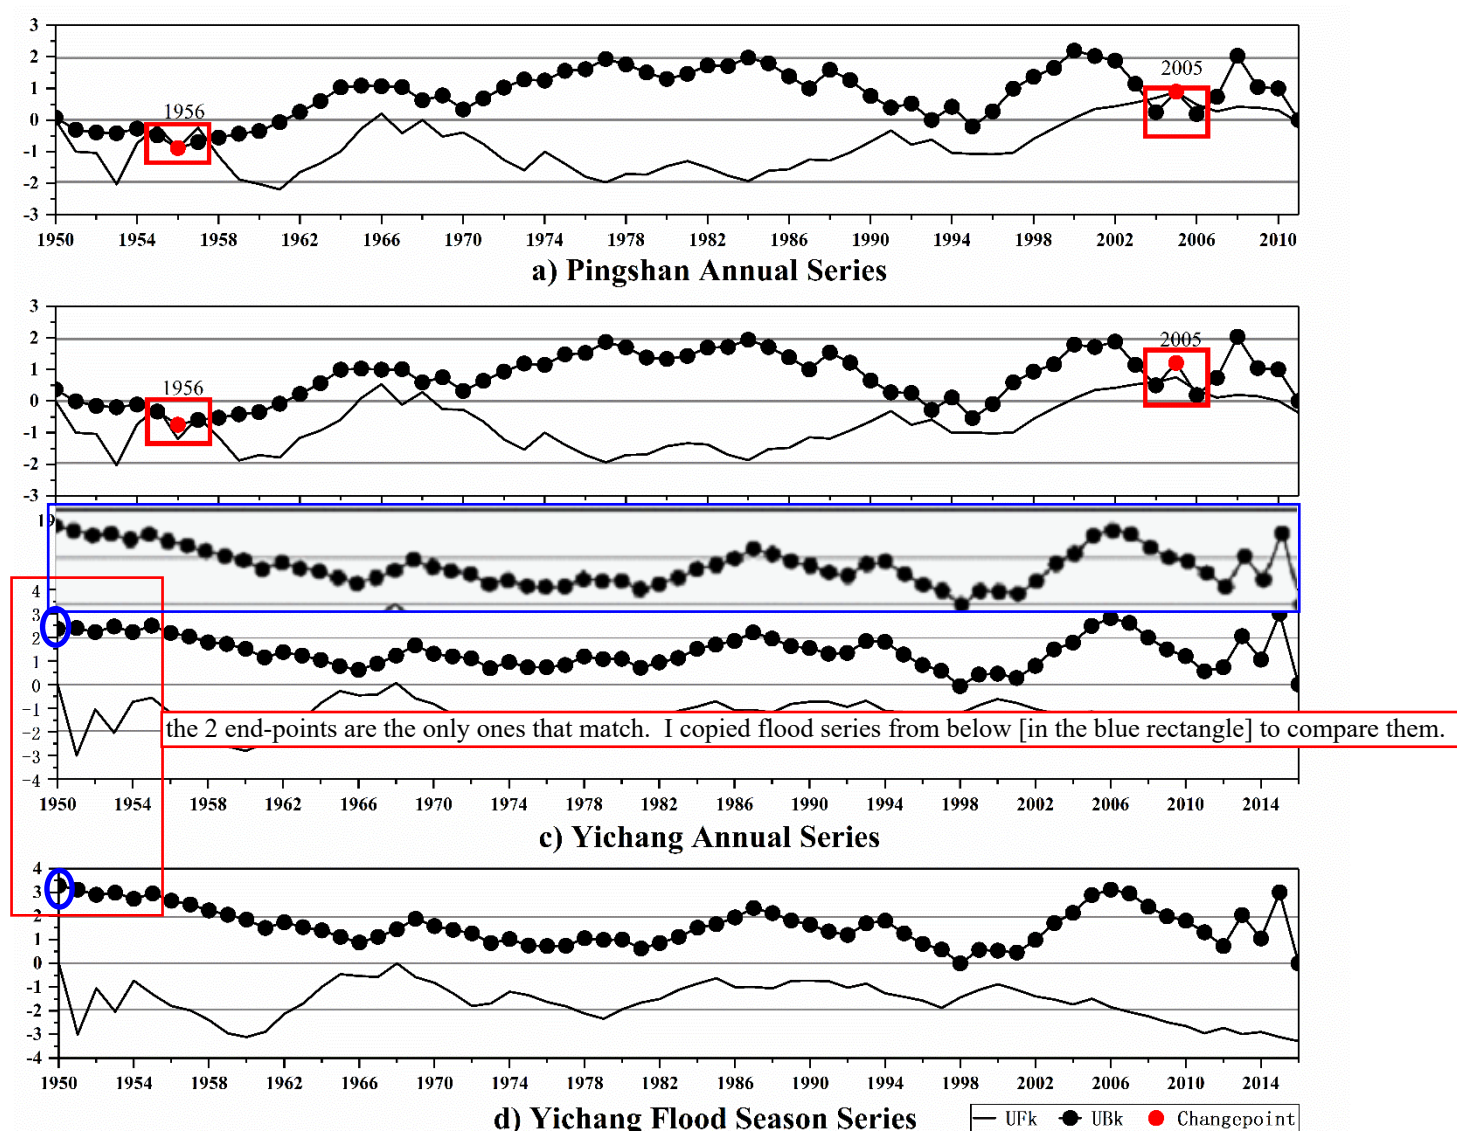

Figure 4: Results of M-K test for Pingshan Station and Yichang Station

Your Figure 4 caption is uninformative. Figure 3 is OK, because the text following that is helpful.

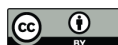

#### 4.1.2 Results of Wavelet Changepoint Detection

In this study, 8 MWT systems and 59 MWT, such as Haar, Daubechies, Biorthogonal, etc. which satisfy biorthogonality, were used to detect the potential changepoints of 4-Series one by one. The number of decomposition layers used is 5, and the results are shown in Table 3.

make the text and table caption more informative

**Table 3: Results of wavelet changepoint detection for Pingshan Station and Yichang Station**

| MWT   | PAS  |      |      | PFSS |      | YAS  |      |      | YFSS |      |
|-------|------|------|------|------|------|------|------|------|------|------|
| db2   | 1999 | 1985 |      | 1999 |      | 1996 | 1975 | 1961 | 1977 | 1975 |
| db3   | —    |      |      | 1985 |      | 1968 |      |      | —    |      |
| db4   | 1999 | 1995 | 1992 | 1999 | 1992 | 1962 |      |      | 1960 |      |
| db5   | —    |      |      | 2000 | 1963 | —    |      |      | —    |      |
| db6   | 2000 | 1965 |      | 2000 | 1965 | 2002 |      |      | 1972 |      |
| db7   | —    |      |      | —    |      | 1962 |      |      | 2000 |      |
| db8   | 1998 | 1992 |      | 1998 | 1991 | 2004 |      |      | 2005 |      |
| db9   | 1965 |      |      | 1964 |      | 1966 |      |      | 1998 |      |
| db10  | 1983 | 1959 |      | —    |      | 1992 | 1965 |      | 1994 | 1967 |
| sym2  | 1999 | 1985 |      | 1999 |      | 1996 | 1975 | 1961 | 1977 | 1975 |
| sym3  | —    |      |      | 1985 |      | 1968 |      |      | —    |      |
| sym4  | 1996 | 1990 |      | 1996 |      | 1959 |      |      | 1959 |      |
| sym5  | —    |      |      | 1983 |      | 2003 |      |      | —    |      |
| sym6  | 1989 | 1963 |      | 1962 |      | 1969 |      |      | 2005 |      |
| sym7  | 1967 |      |      | —    |      | —    |      |      | —    |      |
| sym8  | 1989 |      |      | —    |      | 1998 |      |      | 1999 |      |
| coif1 | —    |      |      | —    |      | 1968 | 1961 |      | —    |      |
| coif2 | 1990 | 1960 |      | 1964 |      | 1971 |      |      | 2005 | 1972 |
| coif3 | —    |      |      | —    |      | 1966 |      |      | 1993 |      |
| coif4 | 1993 | 1992 |      | 1993 | 1990 | 1990 |      |      | —    |      |
| coif5 | 1968 |      |      | 1968 |      | 1998 | 1985 |      | 1969 |      |
| dmey  | 1969 | 1966 |      | 1968 | 1965 | —    |      |      | —    |      |
| fk4   | 1996 |      |      | 1996 |      | 1995 | 1971 |      | 1975 | 1969 |
| fk6   | —    |      |      | —    |      | 1968 |      |      | —    |      |
| fk8   | 1998 | 1992 | 1990 | 1998 | 1989 | 1961 |      |      | 1984 | 1959 |
| fk14  | —    |      |      | 2000 |      | 1966 |      |      | 2003 |      |
| fk18  | —    |      |      | 1966 |      | 2000 |      |      | 1992 |      |
| fk22  | —    |      |      | 1959 |      | —    |      |      | 1983 |      |

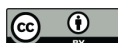

this information should be placed above the table,  
 with db\*, sym\*, coif\*, dmey, & fk\* linked & explained.

It can be seen from Table 3 that among the 8 MWT systems, only Daubechies, Symlets, Coiflets, Dmeyer and Fejer-Korovkin can be used to detect the existence of changepoints in HTS. The number of potential changepoints detected by a single MWT is between 1 and 3. The top two potential changepoint of the PAS are 1992 and 1999, the PFSS are 1999 and 2000, the YAS are 1961 and 1968, and the YFSS are 1975 and 2005. The wavelet changepoint detection can provide 19, 18, 19 and 17 changepoints for the potential changepoint set, which are more than the cumulative anomaly method and the M-K test (Figure 3 and Figure 4). 4 pages back!! Here, refresh the reader:- why are change-points interesting?

As the MWT changes, the detection results are quite different. For the same hydrological station and the same MWT, there is also a difference in the detection results between the annual series and the flood season series, indicating that the wavelet changepoint detection is very sensitive to the flow variation of HTS. Furthermore, the detection results of Pingshan Station are concentrated in 1959-2000, while Yichang Station are concentrated in 1959-2004. Compared with the series length used in the study (Pingshan 1950-2011 and Yichang 1950-2016), the detection results are susceptible to marginal effects, and the potential changepoints at both ends of the series (before and after 10 years) may be ignored.

## 4.2 Changepoints of Pingshan Station and Yichang Station

We deduplicated and sorted the above detection results as potential changepoint sets for each series, with capacities of 31, 30, 31, and 28, respectively. The degree of change (  $p$  ) before and after each potential changepoint was calculated by the K-S test. Taking PAS as an example, the calculation results of key years are shown in Figure 5a. The changepoint trajectories (marked with red lines and blue dots) and alternative trajectories of 4-Series were determined according to the Detection Criteria in Section 2.3, as shown in Figure 5b-c.



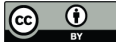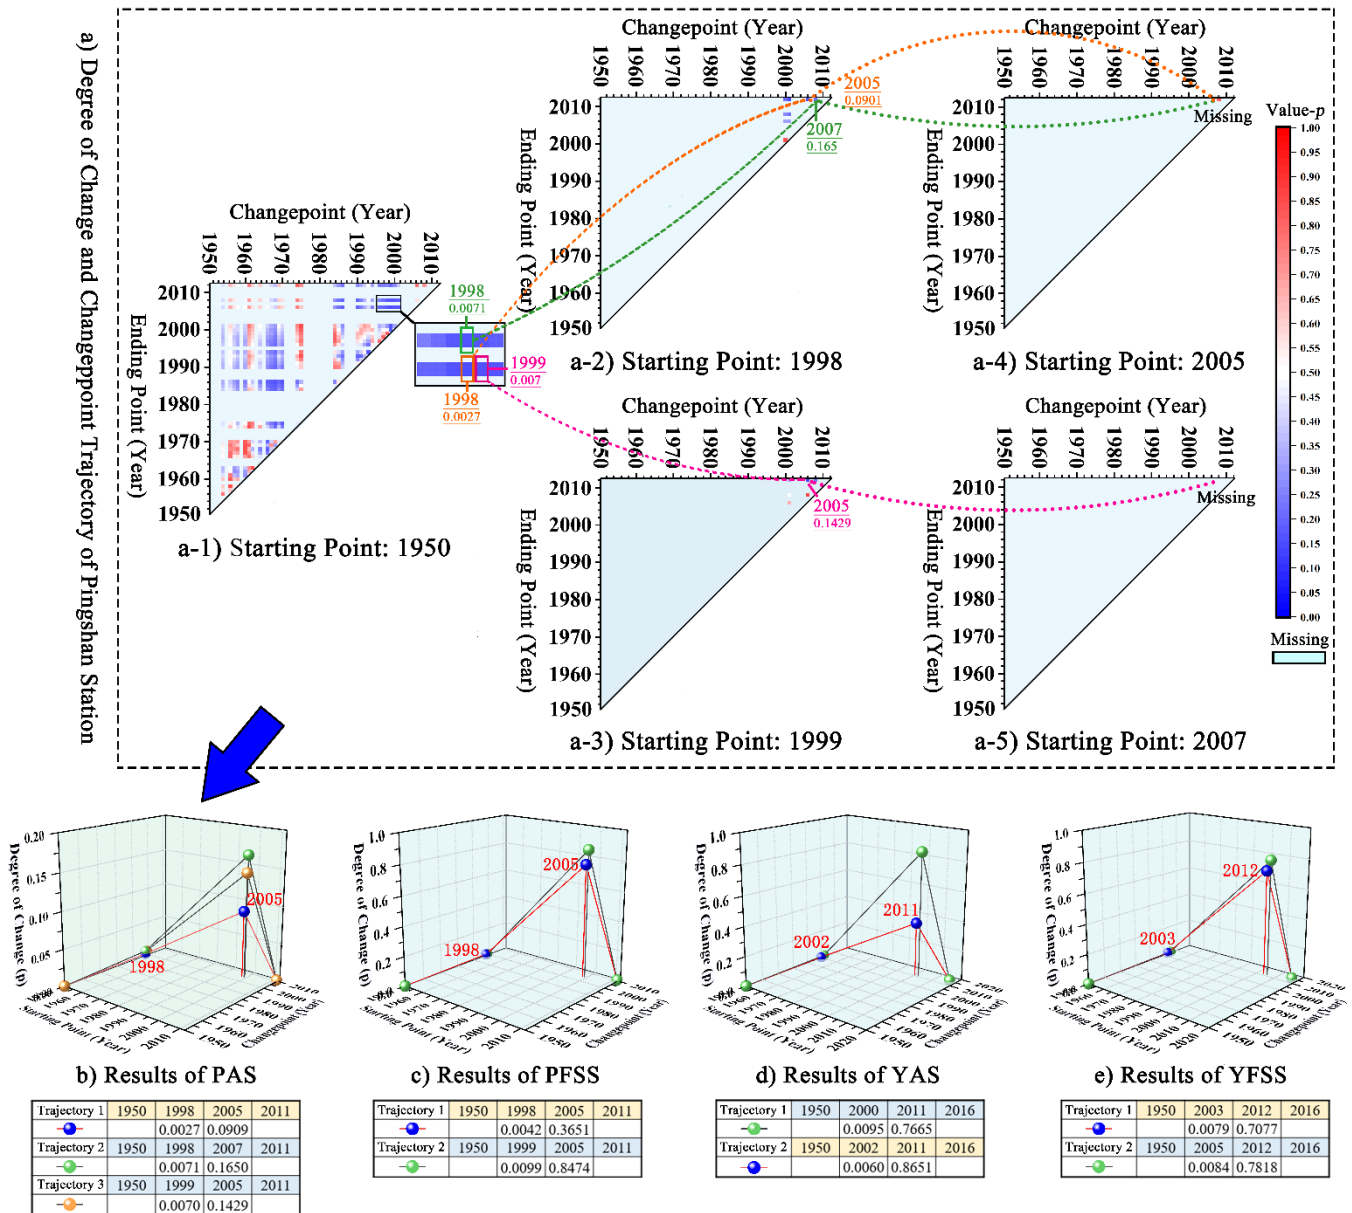

Figure 5: Changepoint trajectory of Pingshan Station and Yichang Station (Confidence Level 99%)

For PAS, The starting point of the changepoint trajectory is 1950. We need to find the grid point with  $p < 0.01$  in Figure 5a-1. Then, with the changepoint as the starting point and the ending point as the changepoint, find the grid point with  $p < 0.01$  until 2011. At Confidence Level 99%, there are 3 points in Figure 5a-1 that meet the requirements of Detection Criterion ①, namely 1950-1998-2005 (Trajectory 1), 1950-1998-2007 (Trajectory 2) and 1950-1999-2005 (Trajectory 3), and  $p$  is shown in Figure 5b. It can be seen that the Detection Criterion ① can effectively narrow the selection range of

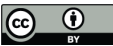

changepts from many potential points. Detection Criterion ② requires further search extending to 2011, which can fully explore the changept and ensure the continuity of the trajectory. When there are multiple alternative trajectories with inconsistent number of changepts, Detection Criterion ③ requires to select the one with the most points, which helps to divide the series in detail. Figure 5b~e shows all alternative trajectories that meet the requirements of the above 3 detection criteria. According to Detection Criterion ④, select the year with small  $p$  of the first  $M - 1$  changepts one by one, which can make the series before and after the changept have a large degree of change. In addition, requiring the last changept  $p \geq 0.05$  can ensure the consistency of subsequent series and complete the changept detection of the whole series.

Based on the changept detection framework, the year in which the series consistency has changed due to human factors (water storage of large reservoirs, etc.) can be determined (Figure 5b~e red line). The changept trajectory of PFSS is consistent with PAS, while YFSS lags behind YAS by one year. The reason could be related to the interannual variation of runoff. The flood season of Pingshan Station is from June to November, accounting for 81.34% of the annual average runoff. The upstream Ertan Reservoir (water storage in May 1998) has seasonal regulation capacity, so it can have a direct impact on PFSS, which is divided into 1950-1997, 1998-2004 and 2005-2011. However, the flood season of Yichang Station is from May to October, and the runoff in May accounts for 7.1% of the year. The annual mean runoff from 2001 to 2004 is 13154.73 m<sup>3</sup>/s, 12454.25 m<sup>3</sup>/s, 12991.84 m<sup>3</sup>/s and 13115.10 m<sup>3</sup>/s respectively. The monthly mean runoff in flood season from 2001 to 2004 is 20010.98 m<sup>3</sup>/s, 18895.22 m<sup>3</sup>/s, 20690.22 m<sup>3</sup>/s and 19841.30 m<sup>3</sup>/s respectively. For hydrological regime, 2002 is a year with less water inflow, while 2003 is the opposite. However, affected by the Three Gorges Reservoir, the water inflow in 2002 is closer to 2003-2010 in the flood season series, while the annual series is closer to 1950-2001. It indirectly shows that the changept detection framework proposed in this study considers the influence of both human factors and hydrological regime on the series. The HTS division results of Pingshan Station and Yichang Station are shown in Figure 5b~e. Dividing series helps ensure consistency of HTS and provides a basis for better information mining through statistical analysis methods.

4.3 MWT Optimization

Based on the changept trajectories, the detection accuracy of the three methods was calculated, and the MWT optimization can be completed according to the Optimization Criteria in Section 2.4. The screening process is shown in Table 3, and the optimization results of MWT are shown in Table 4.

Try not to split the table over 2 pages ...

Table 4: Changept and optimal MWT of Pingshan Station and Yichang Station (Confidence Level 99%)

| Detection Method | Cumulative Anomaly |               | M-K Test |               | Wavelet Changept Detection |               | Optimal MWT |
|------------------|--------------------|---------------|----------|---------------|----------------------------|---------------|-------------|
|                  | Accuracy           | Contribution1 | Accuracy | Contribution1 | Accuracy                   | Contribution1 |             |



It would be nice if you remind the reader what db and fk stand for. They are defined obliquely in Table 1, but you would help the reader as to what these mean at this stage. It's too much to carry in one's head among the large number of other acronyms. You authors have worked on these for months and they are familiar to you, not us who have a few days to grasp the story which is new and complex ....

|      |       |        |     |       |     |        |          |   |
|------|-------|--------|-----|-------|-----|--------|----------|---|
| PAS  | 6.67% | 48.39% | 50% | 6.45% | 50% | 61.29% | db8      | ? |
| PFSS | 6.67% | 50%    | 50% | 6.67% | 50% | 60%    | db8, fk8 |   |
| YAS  | 6.25% | 51.62% | 0   | 0     | 50% | 32.26% | db6      |   |
| YFSS | 5.56% | 64.29% | 0   | 0     | 50% | 60.71% | fk14     |   |

Note 1: Contribution refers to the contribution of detection method to the potential changepoint set.

Combining the MWT optimization results in Table 3 and Table 4, it is found that the changepoint is the key to series division, and Optimization Criterion (1) can quickly locate the MWT that conforms to the series characteristics. For Pingshan Station, the annual series of MWT meeting Optimization Criterion (1) is db8, and the flood season series are db8 and fk8. The Optimization Criterion (2) is selected according to the runoff physical cause at the same station, which makes it easier to analyse the evolution of the two series from the time-frequency space of the same MWT. Therefore, the optimal MWT of PFSS is db8.

When the optimal MWT of the series is determined, the accuracy of wavelet changepoint detection is generally higher than the M-K test and the cumulative anomaly method (Table 4). Except for YAS, the contribution rate of wavelet changepoint detection to the overall potential changepoint is also higher than both of them. The results show that the Optimization Criterion proposed in this study can accurately screen the optimal MWT of each series. The wavelet transform based on the MWT conforming to the series characteristics is helpful to improve the rationality of the analysis.

#### 4.4 HTS Evolution of Pingshan Station and Yichang Station

Based on the optimization results of MWT in Table 4, the evolution of 4-Series was analysed by CWT. To further explore the influence of MWT, Haar, Morlet and Mexican Hat (referred to as 3 common wavelets) were used in CWT of PAS, as shown in Figure 6a. The analysis results of the optimal MWT are shown in Figure 6b~e.



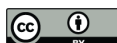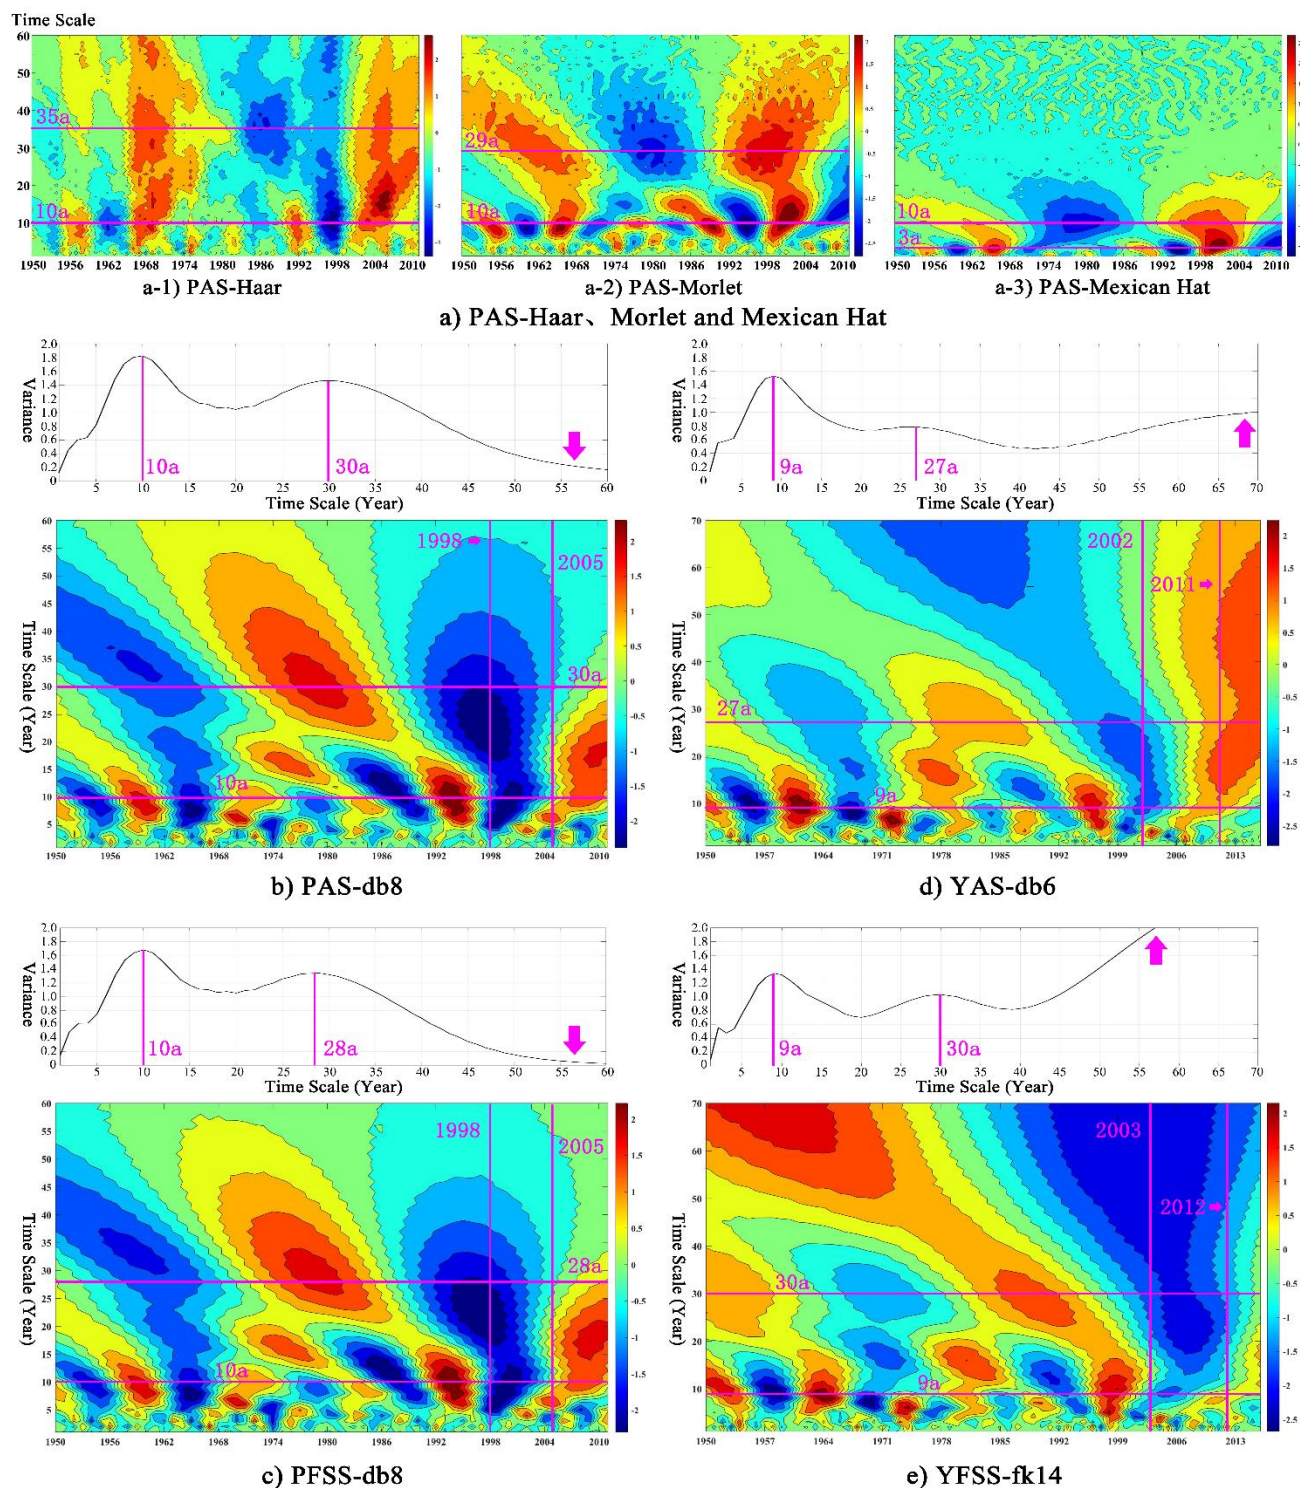

**Figure 6: Changepoint trajectory of Pingshan Station and Yichang Station (Confidence Level 99%)**

Make your figure captions more informative. The reader should not have to trawl through the text to find what you are presenting. Remember that, of those who open the article there are 4 sorts: 1. The casual person who checks the title and possibly the abstract; then 2. the skimmer who checks the abstract and the figures; 3. the reader who having done 1 & 2 will check the conclusion as well; finally 4. the keen hydrometeorologist who reads the lot. I guess that the percentages of the 4 groups from 1 to 4 is: 50%, 25%, 15% & 10%



('a' is 'year' abbreviated)

The 3 common wavelets have great differences in the analysis results of the main periods of PAS, namely 10a and 35a, 10a and 29a, and 3a and 10a (Figure 6a). Furthermore, they frequently alternate between wet and dry in the short time period, and exhibit a distinct "Wet-Dry-Wet" evolution over the long time period. Compared with Figure 6b, the CWT of 3 common wavelets is relatively scattered in the time scale of 0 to 60a, and the Morlet and Mexican Hat wavelets show a wet period after 1998, which does not reflect the regulation effect of the Ertan Reservoir on Pingshan Station, and the accuracy of the analysis results is questionable. According to historical records, during the flood season in June 1998, a basin-wide flood occurred in the middle and lower Yangtze River due to continuous heavy rain in Dongting Lake and Panyang lake below Yichang Station (Zhang et al., 2021). From the time scale (Figure 6b-c), Pingshan Station and Yichang Station suffer continuous dry years, which is consistent with the actual situation. Based on the analysis of integrated moisture transport, land-falling atmospheric rivers geometric metrics and large-scale climatic circulations, Ayantobo et al. (2022) believed that the extreme rainfall in the Yangtze River Basin had a declining period after 1999, which was consistent with the analysis results of this study. We believe that optimizing the MWT that conform to series characteristics based on the changepoint detection is a suitable approach.

According to the analysis, the main periods of PAS are 10a and 30a, and the flood season series are 10a and 29a. The long-period scale of flood season is slightly earlier than the annual series, indicating that the annual adjustment of Pingshan Station has a certain buffer capacity. On the short-period scale 10a, the two series show the phenomenon of frequent alternation of wet and dry seasons, but the consecutive dry seasons from 1926 to 1968 and 1998 to 2004 have a serious impact on the series. Especially after 1998, due to the operation of Ertan Reservoir, the runoff reduction in the annual series is larger than that in flood season, so attention should be paid to the annual water demand of river channels and cities along the route. From 2005 to 2011, Pingshan Station had the wet season, and attention should be paid to flood control and flood resource utilization. The main periods of YAS are 9a and 27a, and the main periods of flood season series are 9a and 31a. Similarly, Yichang Station frequently alternates between wet and dry on the short-period scale. The annual series shows the evolution of "Wet-Dry-Wet-Dry-Wet" on the long-period scale, while the flood season series shows "Wet-Dry-Wet-Dry". After 2002-2003, YFSS did not enter the wet season as the annual series, indicating that the operation of the Three Gorges reservoir has a large reduction in the flood season. On the premise of ensuring the storage of the downstream reservoir at the end of the flood season, it is helpful to adjust the annual and interannual distribution of the runoff in the Yangtze River and improve the utilization efficiency of water resources.

In the conclusion, redefine the acronyms in full for the reader. It's standard and neater.

## 5 Conclusion

HTS is the basis of water conservancy project planning and construction. However, under the multiple effects of human activities and other factors, the consistency of HTS is destroyed. It is necessary to analyse its evolution to ensure the rationality of hydrological and hydraulic calculation. Wavelet transform is one of the widely used analysis tools of evolution in hydrology, but its analysis accuracy is closely related to MWT. To solve these two problems, with the help of



360 cumulative anomaly method, M-K test and wavelet changepoint detection, we proposed a changepoint detection framework and a MWT optimization framework in this study, and took Pingshan Station and Yichang Station of the Yangtze River as study cases to test their effectiveness. The main conclusions are summarised as follows.

The change-point detection framework is based on three changepoint detection methods. (1) The potential changepoint set of HTS is constructed, which can make up for the limitations of a single method affected by factors such as parameter setting and marginal effect. In addition, with the help of the S test, we proposed the Detection Criteria to quickly confirm the changepoint trajectory from the beginning to the end of HTS. While ensuring the uniqueness of the result, the changepoint formed by the combined action of multiple factors can be accurately identified to complete the series division.

Then the MWT optimization framework, based on the changepoint detection accuracy of wavelet changepoint detection, the MWT consistent with the series characteristics can be selected to ensure the accuracy of wavelet transform to analyse the HTS evolution and provide a good basis for hydrological and hydraulic calculation.

It was found that the changepoints of PAS and PFSS are both 1998 and 2005, YAS are 2002 and 2011, and YFSS are 2003 and 2012. In addition, the optimal MWT of 4-Series are db8, db8, db6 and fk8 respectively. The Ertan Reservoir has a greater impact on the annual runoff of Pingshan Station, while the Three Gorges Reservoir only reduces the runoff of the Yichang Station to a large extent during the flood season. Limited by the data, we did not explore the evolution of the two stations after 2017. It is also found that the wavelet changepoint detection is not sufficient enough to detect the potential changepoint of 10 years before and after the series.

## Acknowledgements

The authors would like to give special thanks to the anonymous reviewers.

## Authors' Contributions

380 **Jiqing Li:** Conceptualization, Validation, Writing - Review & Editing, Supervision, Project administration, Funding acquisition

**Jing Huang:** Conceptualization, Methodology, Software, Formal analysis, Resources, Writing - Original Draft, Visualization

**Lei Zheng:** Methodology, Software, Formal analysis, Data Curation

385 **Wei Zheng:** Software, Validation, Investigation, Visualization



## Funding

This study is financially supported by the National Natural Science Foundation of China (No. 52179014, No. 51641901) and the National Key R&D Program of China (2016YFC0402208, 2016YFC0401903, 2017YFC0405900).

## Data Availability Statement

390 Data for this study can be downloaded from the Yangtze River Hydrological Network (<http://www.cjh.com.cn/>). In this study, the wavelet changepoint detection is based on the Matlab (R2020b) toolbox, and the rest of the codes (PyCharm 2021.2.2) are available from the corresponding author upon reasonable request.

## Compliance with Ethical Standard

395 **Declaration** The authors confirm that this article is original research and has not been published or presented previously in any journal or conference.

**Conflict of Interest** None.

**Ethical Approval** Not applicable.

**Consent to Participate** Not applicable.

**Consent to Publish** Not applicable.

Please indent the leading line of the articles by ten small spaces [..... ]  
 - it makes them easier for the reader to locate.

## 400 References

- Ayantobo, O. O., Wei J. and Wang G.: Climatology of landfalling atmospheric rivers and its attribution to extreme precipitation events over Yangtze River Basin, *J. Atmos Res*, 270, 106077, doi:10.1016/j.atmosres.2022.106077, 2022.
- Benhassine, N. E., Boukaache, A. and Boudjehem, D.: Medical image denoising using optimal thresholding of wavelet coefficients with selection of the best decomposition level and mother wavelet, *J. Int J Imag Syst Tech*, 31, 1906-20, doi:10.1002/ima.22589, 2021.
- 405 Chen, Y., Paschalis, A., Wang, L. and Onof, C.: Can we estimate flood frequency with point-process spatial-temporal rainfall models?, *J. J Hydrol*, 600, 126667, doi:10.1016/j.jhydrol.2021.126667, 2021.
- Corradin, R., Danese, L. and Ongaro, A.: Bayesian nonparametric change point detection for multivariate time series with missing observations, *J. Int J Approx Reason*, 143, 26-43, doi:10.1016/j.ijar.2021.12.019, 2022.
- 410 Dang, C., Zhang, H., Singh, V. P., Zhi, T., Zhang, J. and Ding, H.: A statistical approach for reconstructing natural streamflow series based on streamflow variation identification, *J. Hydrol Res* 52, 1100-15, doi:10.2166/nh.2021.180, 2021.
- Fang, L. and Shao, D.: Application of Long Short-Term Memory (LSTM) on the Prediction of Rainfall-Runoff in Karst Area, *J. Frontiers in Physics*, 9, doi:10.3389/fphy.2021.790687, 2022.



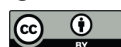

- Jia, B., Zhou, J., Tang, Z., Xu, Z., Chen, X. and Fang, W.: Effective stochastic streamflow simulation method based on  
 415 Gaussian mixture model, *J. J Hydrol*, 605, 127366, doi:10.1016/j.jhydrol.2021.127366, 2022.
- Li, J., Huang, J., Chu, X. and Lund, J. R.: An Improved Peaks-Over-Threshold Method and its Application in the Time-  
 Varying Design Flood, *J. Water Resour Manag*, 35, 933-48, doi:10.1007/s11269-020-02758-3, 2021.
- Liu, W., Wen, J., Chen, J., Wang, Z., Lu, X., Wu, Y., et al.: Characteristic analysis of the spatio-temporal distribution of key  
 variables of the soil freeze-thaw processes over the Qinghai-Tibetan Plateau, *J. Cold Reg Sci Technol*, 197, 103526,  
 420 doi:10.1016/j.coldregions.2022.103526, 2022.
- Malki, A., Atlam, E. and Gad, I.: Machine learning approach of detecting anomalies and forecasting time-series of IoT  
 devices, *J. Alexandria Engineering Journal*, 61, 8973-86, doi:10.1016/j.aej.2022.02.038, 2022.
- Mat Jan, N. A., Shabri, A. and Samsudin, R.: Handling non-stationary flood frequency analysis using TL-moments approach  
 for estimation parameter, *J. J Water Clim Change*, 11, 966-79, doi:10.2166/wcc.2019.055, 2020.
- 425 Moradi, M.: Wavelet transform approach for denoising and decomposition of satellite-derived ocean color time-series:  
 Selection of optimal mother wavelet, *J. Adv Space Res*, 69, 2724-44, doi:10.1016/j.asr.2022.01.023, 2022.
- Nielsen, M.: On the Construction and Frequency Localization of Finite Orthogonal Quadrature Filters, *J. J Approx Theory*,  
 108, 36-52, doi:10.1006/jath.2000.3514, 2001.
- Oliveira-Júnior, J. F. D., Correia, F. W., Monteiro, L. D. S., Shah, M., Hafeez, A., Gois, G. D., et al. Urban rainfall in the  
 430 Capitals of Brazil: Variability, trend, and wavelet analysis, *J. Atmos Res*, 267, 105984, doi:10.1016/j.atmosres.2021.105984,  
 2022.
- Qin, Y., Sun, X., Li, B. and Merz, B.: A nonlinear hybrid model to assess the impacts of climate variability and human  
 activities on runoff at different time scales, *J. Stoch Env Res Risk A*, 35, 1917-29, doi:10.1007/s00477-021-01984-4, 2021.
- Sanaa, H., Gab, A., Ukkola, A. M., Martin, D. K., Andy, P., et al.: Reconciling historical changes in the hydrological cycle  
 435 over land, *J. NPJ climate and atmospheric science*, 5, 1-9. doi:10.1038/s41612-022-00240-y, 2022.
- Şen, Z.: Jump point identification in hydro-meteorological time series by crossing methodology, *J. Theor Appl Climatol* 144,  
 769-77, doi:10.1007/s00704-021-03576-2, 2021.
- Shi, X., Gallagher, C., Lund, R. and Killick, R.: A comparison of single and multiple changepoint techniques for time series  
 data, *J. Comput Stat Data An*, 170, 107433, doi:10.1016/j.csda.2022.107433, 2022.
- 440 Wang, S. H., Su, B. R., Wang, Y. Q., Wang, Y. J., Zhu, J. Q. and Fu, J.: Change analysis of runoff and sediment in the Three  
 Gorges Reservoir Region in recent 16 years, *J. Science of Soil and Water Conservation*, 19, 69-78,  
 doi:10.16843/j.sswc.2021.01.009, 2021 (In Chinese)
- Stasolla, M. and Neyt, X.: Enhanced Morphological Filtering for Wavelet-Based Changepoint Detection, *J. IEEE*, 56-60,  
 doi:10.1109/SITIS.2019.00021, 2019.
- 445 Strömbergsson, D., Marklund, P., Berglund, K., Saari, J. and Thomson, A.: Mother wavelet selection in the discrete wavelet  
 transform for condition monitoring of wind turbine drivetrain bearings, *J. Wind Energy*, 22, 1581-92, doi:10.1002/we.2390,  
 2019.



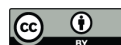

- Xie, Y., Liu, S., Huang, S., Fang, H., Ding, M., Huang, C., et al.: Local trend analysis method of hydrological time series based on piecewise linear representation and hypothesis test, *J. J Clean Prod*, 339, 130695, doi:10.1016/j.jclepro.2022.130695, 2022.
- 450 Zerouali, B., Chettih, M., Abda, Z., Mesbah, M., Santos, C. A. G., Brasil, N. R. M.: A new regionalization of rainfall patterns based on wavelet transform information and hierarchical cluster analysis in northeastern Algeria, *J. Theor Appl Climatol*, 147, 1489-510, doi:10.1007/s00704-021-03883-8, 2022.
- Zhang, Y., Fang, G., Tang, Z., Wen, X., Zhang, H., Ding, Z., et al.: Changes in Flood Regime of the Upper Yangtze River, *J.*  
 455 *Frontiers in Earth Science*, 9, doi:10.3389/feart.2021.650882, 2021.
- Zhao, Y. H., Yu, B. K., Qu, P., Li, S., Zhan, D. Q. and Wang, X. Q.: Analysis of runoff variation characteristics in Yishuhe River Basin. *IOP conference series, J. Earth and environmental science*, 344, 12080, doi:10.1088/1755-1315/344/1/012080, 2019.
